# Supplementary material for: Influence of proline and hydroxyproline as antimicrobial and anticancer peptide components on the silver(i) ion activity: structural and biological evaluation with a new theoretical and experimental SAR approach
Source: Royal Society of Chemistry journal article supplement (doi:10.1039/d4dt00389f), 2024-01-01
Supplement: d4dt00389f1.pdf [file d4dt00389f1.pdf]

## Supplementary material

### **Influence of proline and hydroxyproline as antimicrobial and anticancer peptide components on the silver(I) ion activity: structural and biological evaluation with a new theoretical and experimental SAR approach**

Gabriela Kuzderová,<sup>a</sup> Simona Sovová,<sup>b,c</sup> Michaela Rendošová,<sup>a</sup> Róbert Gyepes,<sup>d</sup> Danica Sabolová,<sup>b</sup> Ivona Kožárová,<sup>c</sup> Ludmila Balážová,<sup>e</sup> Mária Vilková,<sup>f</sup> Martin Kello,<sup>g</sup> Alan Liška,<sup>h</sup> and Zuzana Vargová<sup>\*a</sup>

<sup>a</sup>*Department of Inorganic Chemistry, Faculty of Science, P. J. Šafárik University, Moyzesova 11, 041 54 Košice, Slovak Republic*

<sup>b</sup>*Department of Biochemistry, Faculty of Science, P. J. Šafárik University, Moyzesova 11, 041 54 Košice, Slovak Republic*

<sup>c</sup>*Department of Food Hygiene, Technology and Safety, University of Veterinary Medicine and Pharmacy, Komenského 73, 041 81 Košice, Slovak republic*

<sup>d</sup>*Department of Inorganic Chemistry, Faculty of Science, Charles University, Hlavova 2030, 128 00 Prague, Czech Republic*

<sup>e</sup>*Department of Pharmaceutical Technology, Pharmacognosy and Botany, University of Veterinary Medicine and Pharmacy, Komenského 73, 041 81 Košice, Slovak Republic*

<sup>f</sup>*NMR Laboratory, Faculty of Science, P. J. Šafárik University, Moyzesova 11, 041 54 Košice, Slovak Republic*

<sup>g</sup>*Department of Pharmacology, Faculty of Medicine, P. J. Šafárik University, Trieda SNP 1, 040 11 Košice, Slovak Republic*

<sup>h</sup>*Department of Molecular Electrochemistry and Catalysis, J. Heyrovský Institute of Physical Chemistry of the CAS, Dolejškova 3/2155, 182 23 Praha 8, Czech Republic*

Table S1 Crystal data and structure refinement for silver(I) complexes.

|                                            | <b>AgPro</b>                                                                   | <b>AgHyp</b>                                                                   |
|--------------------------------------------|--------------------------------------------------------------------------------|--------------------------------------------------------------------------------|
| Empirical formula                          | C <sub>10</sub> H <sub>18</sub> Ag <sub>2</sub> N <sub>4</sub> O <sub>10</sub> | C <sub>10</sub> H <sub>18</sub> Ag <sub>2</sub> N <sub>4</sub> O <sub>12</sub> |
| Formula weight                             | 570.02                                                                         | 602.02                                                                         |
| Temperature [K]                            | 120(2)                                                                         | 120(2)                                                                         |
| Wavelength [Å]                             | 0.71073                                                                        | 0.71073                                                                        |
| Crystal system                             | Monoclinic                                                                     | Monoclinic                                                                     |
| Space group                                | <i>P</i> 2 <sub>1</sub>                                                        | <i>P</i> 2 <sub>1</sub>                                                        |
| Unit cell dimensions                       | <i>a</i> = 5.4739(1)                                                           | <i>a</i> = 5.5261(4)                                                           |
| [Å, °]                                     | <i>b</i> = 11.0228(3)                                                          | <i>b</i> = 11.2082(8)                                                          |
|                                            | <i>c</i> = 13.9383(4)                                                          | <i>c</i> = 14.0565(12)                                                         |
|                                            | $\alpha$ = 90                                                                  | $\alpha$ = 90                                                                  |
|                                            | $\beta$ = 98.0410(10)                                                          | $\beta$ = 97.992(3)                                                            |
|                                            | $\gamma$ = 90                                                                  | $\gamma$ = 90                                                                  |
| Volume [Å <sup>3</sup> ]                   | 832.74(4)                                                                      | 862.17(11)                                                                     |
| <i>Z</i>                                   | 2                                                                              | 2                                                                              |
| Calculated density [g.cm <sup>-3</sup> ]   | 2.273                                                                          | 2.319                                                                          |
| Absorption coefficient [mm <sup>-1</sup> ] | 2.414                                                                          | 2.346                                                                          |
| <i>F</i> (000)                             | 560                                                                            | 592                                                                            |
| Crystal size [mm <sup>3</sup> ]            | 0.437 x 0.070 x 0.066                                                          | 0.171 x 0.162 x 0.058                                                          |
| $\theta$ range for data collection [°]     | 2.365 – 29.980                                                                 | 2.333 – 26.489                                                                 |
| Index ranges                               | -6 ≤ <i>h</i> ≤ 7, -15 ≤ <i>k</i> ≤ 15, -19 ≤ <i>l</i> ≤ 18                    | -6 ≤ <i>h</i> ≤ 6, -14 ≤ <i>k</i> ≤ 14, -17 ≤ <i>l</i> ≤ 17                    |
| Reflections collected/unique               | 21750 / 4834                                                                   | 31594 / 3526                                                                   |
| Data / restraints / parameters             | 4834 / 0 / 251                                                                 | 3526 / 17 / 267                                                                |
| Completeness to $\theta$ = 25.242° [%]     | 99.9                                                                           | 99.6                                                                           |
| Max. and min. transmission                 | 0,86 and 0.66                                                                  | 0.88 and 0.72                                                                  |
| Goodness-of-fit on <i>F</i> <sup>2</sup>   | 1.036                                                                          | 1.108                                                                          |

|                                                     |                                |                                |
|-----------------------------------------------------|--------------------------------|--------------------------------|
| Final $R$ indices [ $I > 2\sigma(I)$ ]              | $R1 = 0.0152$ ; $wR2 = 0.0329$ | $R1 = 0.0351$ ; $wR2 = 0.1062$ |
| $R$ indices (all data)                              | $R1 = 0.0156$ ; $wR2 = 0.0331$ | $R1 = 0.0358$ ; $wR2 = 0.1071$ |
| Largest diff. peak and hole [ $e.\text{\AA}^{-3}$ ] | 0.544, -0.426                  | 2.396, -1.008                  |

Table S2 Bond distances ( $\text{\AA}$ ) and angles ( $^\circ$ ) for **AgPro**

| <b>Bond distances</b>           |            |                               |            |
|---------------------------------|------------|-------------------------------|------------|
| Ag(1)—O(2)                      | 2.2210(18) | C(5)—H(5B)                    | 0.9900     |
| Ag(1)—O(3)                      | 2.2334(18) | O(3)—C(6)                     | 1.262(3)   |
| Ag(1)—O(1) <sup>i</sup>         | 2.4230(15) | O(4)—C(6)                     | 1.249(3)   |
| Ag(1)—O(8)                      | 2.592(2)   | C(6)—C(7)                     | 1.523(3)   |
| Ag(1)—Ag(2)                     | 2.8375(3)  | C(7)—N(2)                     | 1.504(3)   |
| Ag(2)—O(4)                      | 2.2748(18) | C(7)—C(8)                     | 1.535(4)   |
| Ag(2)—O(1)                      | 2.3605(17) | C(7)—H(7)                     | 1.0000     |
| Ag(2)—O(3) <sup>ii</sup>        | 2.3887(17) | N(2)—C(10)                    | 1.506(4)   |
| O(1)—C(1)                       | 1.251(3)   | N(2)—H(2NA)                   | 0.85(4)    |
| O(2)—C(1)                       | 1.256(3)   | N(2)—H(2NB)                   | 0.83(3)    |
| C(1)—C(2)                       | 1.522(3)   | C(8)—C(9)                     | 1.522(4)   |
| C(2)—N(1)                       | 1.508(3)   | C(8)—H(8A)                    | 0.9900     |
| C(2)—C(3)                       | 1.547(4)   | C(8)—H(8B)                    | 0.9900     |
| C(2)—H(2)                       | 1.0000     | C(9)—C(10)                    | 1.507(4)   |
| N(1)—C(5)                       | 1.494(4)   | C(9)—H(9A)                    | 0.9900     |
| N(1)—H(1NA)                     | 0.97(4)    | C(9)—H(9B)                    | 0.9900     |
| N(1)—H(1NB)                     | 0.77(4)    | C(10)—H(10A)                  | 0.9900     |
| C(3)—C(4)                       | 1.526(4)   | C(10)—H(10B)                  | 0.9900     |
| C(3)—H(3A)                      | 0.9900     | N(3)—O(5)                     | 1.241(3)   |
| C(3)—H(3B)                      | 0.9900     | N(3)—O(7)                     | 1.256(3)   |
| C(4)—C(5)                       | 1.529(4)   | N(3)—O(6)                     | 1.259(3)   |
| C(4)—H(4A)                      | 0.9900     | N(4)—O(9)                     | 1.234(3)   |
| C(4)—H(4B)                      | 0.9900     | N(4)—O(10)                    | 1.255(3)   |
| C(5)—H(5A)                      | 0.9900     | N(4)—O(8)                     | 1.272(3)   |
| <b>Bond angles</b>              |            |                               |            |
| O(2)—Ag(1)—O(3)                 | 165.63(7)  | C(4)—C(5)—H(5A)               | 111.3      |
| O(2)—Ag(1)—O(1) <sup>i</sup>    | 112.77(6)  | N(1)—C(5)—H(5B)               | 111.3      |
| O(3)—Ag(1)—O(1) <sup>i</sup>    | 81.20(6)   | C(4)—C(5)—H(5B)               | 111.3      |
| O(2)—Ag(1)—O(8)                 | 91.55(7)   | H(5A)—C(5)—H(5B)              | 109.2      |
| O(3)—Ag(1)—O(8)                 | 82.06(7)   | C(6)—O(3)—Ag(1)               | 124.81(16) |
| O(1) <sup>i</sup> —Ag(1)—O(8)   | 101.08(7)  | C(6)—O(3)—Ag(2) <sup>i</sup>  | 130.33(15) |
| O(2)—Ag(1)—Ag(2)                | 90.03(5)   | Ag(1)—O(3)—Ag(2) <sup>i</sup> | 101.98(7)  |
| O(3)—Ag(1)—Ag(2)                | 77.04(5)   | C(6)—O(4)—Ag(2)               | 116.45(16) |
| O(1) <sup>i</sup> —Ag(1)—Ag(2)  | 154.63(5)  | O(4)—C(6)—O(3)                | 126.8(2)   |
| O(8)—Ag(1)—Ag(2)                | 88.75(5)   | O(4)—C(6)—C(7)                | 118.6(2)   |
| O(4)—Ag(2)—O(1)                 | 152.80(8)  | O(3)—C(6)—C(7)                | 114.6(2)   |
| O(4)—Ag(2)—O(3) <sup>ii</sup>   | 113.16(6)  | N(2)—C(7)—C(6)                | 110.30(19) |
| O(1)—Ag(2)—O(3) <sup>ii</sup>   | 79.40(6)   | N(2)—C(7)—C(8)                | 104.7(2)   |
| O(4)—Ag(2)—Ag(1)                | 85.08(5)   | C(6)—C(7)—C(8)                | 111.5(2)   |
| O(1)—Ag(2)—Ag(1)                | 75.21(4)   | N(2)—C(7)—H(7)                | 110.1      |
| O(3) <sup>ii</sup> —Ag(2)—Ag(1) | 150.92(5)  | C(6)—C(7)—H(7)                | 110.1      |
| C(1)—O(1)—Ag(2)                 | 128.04(15) | C(8)—C(7)—H(7)                | 110.1      |
| C(1)—O(1)—Ag(1) <sup>ii</sup>   | 128.13(16) | C(7)—N(2)—C(10)               | 108.4(2)   |
| Ag(2)—O(1)—Ag(1) <sup>ii</sup>  | 97.36(6)   | C(7)—N(2)—H(2NA)              | 107(2)     |
| C(1)—O(2)—Ag(1)                 | 117.15(16) | C(10)—N(2)—H(2NA)             | 109(2)     |
| O(1)—C(1)—O(2)                  | 127.1(2)   | C(7)—N(2)—H(2NB)              | 114(2)     |
| O(1)—C(1)—C(2)                  | 115.8(2)   | C(10)—N(2)—H(2NB)             | 111(2)     |
| O(2)—C(1)—C(2)                  | 117.0(2)   | H(2NA)—N(2)—H(2NB)            | 108(3)     |
| N(1)—C(2)—C(1)                  | 111.2(2)   | C(9)—C(8)—C(7)                | 103.6(2)   |

|                    |          |                     |            |
|--------------------|----------|---------------------|------------|
| N(1)—C(2)—C(3)     | 105.0(2) | C(9)—C(8)—H(8A)     | 111.0      |
| C(1)—C(2)—C(3)     | 111.1(2) | C(7)—C(8)—H(8A)     | 111.0      |
| N(1)—C(2)—H(2)     | 109.8    | C(9)—C(8)—H(8B)     | 111.0      |
| C(1)—C(2)—H(2)     | 109.8    | C(7)—C(8)—H(8B)     | 111.0      |
| C(3)—C(2)—H(2)     | 109.8    | H(8A)—C(8)—H(8B)    | 109.0      |
| C(5)—N(1)—C(2)     | 107.4(2) | C(10)—C(9)—C(8)     | 102.9(2)   |
| C(5)—N(1)—H(1NA)   | 110(2)   | C(10)—C(9)—H(9A)    | 111.2      |
| C(2)—N(1)—H(1NA)   | 107(2)   | C(8)—C(9)—H(9A)     | 111.2      |
| C(5)—N(1)—H(1NB)   | 113(3)   | C(10)—C(9)—H(9B)    | 111.2      |
| C(2)—N(1)—H(1NB)   | 112(3)   | C(8)—C(9)—H(9B)     | 111.2      |
| H(1NA)—N(1)—H(1NB) | 108(4)   | H(9A)—C(9)—H(9B)    | 109.1      |
| C(4)—C(3)—C(2)     | 105.0(2) | N(2)—C(10)—C(9)     | 103.2(2)   |
| C(4)—C(3)—H(3A)    | 110.7    | N(2)—C(10)—H(10A)   | 111.1      |
| C(2)—C(3)—H(3A)    | 110.7    | C(9)—C(10)—H(10A)   | 111.1      |
| C(4)—C(3)—H(3B)    | 110.7    | N(2)—C(10)—H(10B)   | 111.1      |
| C(2)—C(3)—H(3B)    | 110.7    | C(9)—C(10)—H(10B)   | 111.1      |
| H(3A)—C(3)—H(3B)   | 108.8    | H(10A)—C(10)—H(10B) | 109.1      |
| C(3)—C(4)—C(5)     | 102.4(2) | O(5)—N(3)—O(7)      | 120.6(2)   |
| C(3)—C(4)—H(4A)    | 111.3    | O(5)—N(3)—O(6)      | 120.5(3)   |
| C(5)—C(4)—H(4A)    | 111.3    | O(7)—N(3)—O(6)      | 118.9(2)   |
| C(3)—C(4)—H(4B)    | 111.3    | O(9)—N(4)—O(10)     | 120.9(2)   |
| C(5)—C(4)—H(4B)    | 111.3    | O(9)—N(4)—O(8)      | 120.6(2)   |
| H(4A)—C(4)—H(4B)   | 109.2    | O(10)—N(4)—O(8)     | 118.5(2)   |
| N(1)—C(5)—C(4)     | 102.4(2) | N(4)—O(8)—Ag(1)     | 109.77(15) |
| N(1)—C(5)—H(5A)    | 111.3    |                     |            |

Symmetry codes: (i) x+1,y,z; (ii) x-1,y,z

Table S3 Possible hydrogen bonds (Å, °) for **AgPro**

| D-H...A                           | d(D-H)  | d(H...A) | d(D...A) | <(DHA) |
|-----------------------------------|---------|----------|----------|--------|
| N(1)—H(1NA)...N(3) <sup>iii</sup> | 0.97(4) | 2.55(4)  | 3.462(3) | 156(3) |
| N(1)—H(1NA)...O(6) <sup>iii</sup> | 0.97(4) | 1.94(4)  | 2.903(3) | 170(3) |
| N(1)—H(1NA)...O(7) <sup>iii</sup> | 0.97(4) | 2.54(4)  | 3.265(3) | 131(3) |
| N(1)—H(1NB)...O(7) <sup>iv</sup>  | 0.77(4) | 2.11(4)  | 2.845(3) | 160(4) |
| N(2)—H(2NA)...O(4)                | 0.85(4) | 2.16(4)  | 2.674(3) | 119(3) |
| N(2)—H(2NA)...O(10) <sup>v</sup>  | 0.85(4) | 2.24(4)  | 2.905(3) | 135(3) |
| N(2)—H(2NB)...O(8) <sup>vi</sup>  | 0.83(3) | 2.03(3)  | 2.815(3) | 156(3) |
| N(2)—H(2NB)...O(10) <sup>vi</sup> | 0.83(3) | 2.52(3)  | 2.979(3) | 116(3) |

Symmetry codes: (iii) -x,y-1/2,-z; (iv) -x+1,y-1/2,-z; (v) -x+1,y+1/2,-z+1; (vi) -x+2,y+1/2,-z+1

Table S4 Bond distances (Å) and angles (°) for **AgHyp**

| Bond distances           |           |            |           |
|--------------------------|-----------|------------|-----------|
| Ag(1)—O(4)               | 2.184(6)  | N(1)—H(1B) | 0.86(4)   |
| Ag(1)—O(1)               | 2.215(6)  | O(4)—C(6)  | 1.259(12) |
| Ag(1)—O(5) <sup>ii</sup> | 2.522(8)  | C(6)—O(5)  | 1.224(11) |
| Ag(1)—Ag(2)              | 2.8756(9) | C(6)—C(7)  | 1.518(12) |
| Ag(2)—O(5)               | 2.309(7)  | C(7)—N(2)  | 1.514(11) |
| Ag(2)—O(2)               | 2.318(6)  | C(7)—C(8)  | 1.530(11) |
| Ag(2)—O(1) <sup>i</sup>  | 2.381(6)  | C(7)—H(7)  | 1.0000    |
| Ag(2)—O(7)               | 2.595(8)  | C(8)—C(9)  | 1.525(12) |
| O(1)—C(1)                | 1.262(10) | C(8)—H(8A) | 0.9900    |
| C(1)—O(2)                | 1.242(11) | C(8)—H(8B) | 0.9900    |
| C(1)—C(2)                | 1.533(11) | C(9)—O(6)  | 1.423(10) |
| C(2)—N(1)                | 1.498(11) | C(9)—C(10) | 1.520(12) |
| C(2)—C(3)                | 1.518(12) | C(9)—H(9)  | 1.0000    |
| C(2)—H(2)                | 1.0000    | O(6)—H(6)  | 0.83(4)   |

|            |           |              |           |
|------------|-----------|--------------|-----------|
| C(3)—C(4)  | 1.529(12) | C(10)—N(2)   | 1.519(11) |
| C(3)—H(3A) | 0.9900    | C(10)—H(10A) | 0.9900    |
| C(3)—H(3B) | 0.9900    | C(10)—H(10B) | 0.9900    |
| C(4)—O(3)  | 1.431(13) | N(2)—H(2A)   | 0.9100    |
| C(4)—C(5)  | 1.533(13) | N(2)—H(2B)   | 0.9100    |
| C(4)—H(4)  | 1.0000    | N(3)—O(8)    | 1.232(11) |
| O(3)—H(3)  | 0.81(4)   | N(3)—O(7)    | 1.255(11) |
| C(5)—N(1)  | 1.506(12) | N(3)—O(9)    | 1.260(11) |
| C(5)—H(5A) | 0.9900    | N(4)—O(10)   | 1.248(11) |
| C(5)—H(5B) | 0.9900    | N(4)—O(11)   | 1.257(11) |
| N(1)—H(1A) | 0.87(4)   | N(4)—O(12)   | 1.259(11) |

### Bond angles

|                                 |            |                               |          |
|---------------------------------|------------|-------------------------------|----------|
| O(4)—Ag(1)—O(1)                 | 165.6(2)   | C(5)—N(1)—H(1A)               | 102(8)   |
| O(4)—Ag(1)—O(5) <sup>ii</sup>   | 111.9(2)   | C(2)—N(1)—H(1B)               | 119(8)   |
| O(1)—Ag(1)—O(5) <sup>ii</sup>   | 79.1(2)    | C(5)—N(1)—H(1B)               | 101(8)   |
| O(4)—Ag(1)—Ag(2)                | 86.76(18)  | H(1A)—N(1)—H(1B)              | 107(10)  |
| O(1)—Ag(1)—Ag(2)                | 79.32(17)  | C(6)—O(4)—Ag(1)               | 120.8(6) |
| O(5) <sup>ii</sup> —Ag(1)—Ag(2) | 147.64(16) | O(5)—C(6)—O(4)                | 127.1(8) |
| O(5)—Ag(2)—O(2)                 | 150.6(2)   | O(5)—C(6)—C(7)                | 116.2(8) |
| O(5)—Ag(2)—O(1) <sup>i</sup>    | 80.3(2)    | O(4)—C(6)—C(7)                | 116.6(7) |
| O(2)—Ag(2)—O(1) <sup>i</sup>    | 112.1(2)   | C(6)—O(5)—Ag(2)               | 128.1(7) |
| O(5)—Ag(2)—O(7)                 | 96.0(2)    | C(6)—O(5)—Ag(1) <sup>i</sup>  | 126.9(6) |
| O(2)—Ag(2)—O(7)                 | 92.1(2)    | Ag(2)—O(5)—Ag(1) <sup>i</sup> | 96.8(2)  |
| O(1) <sup>i</sup> —Ag(2)—O(7)   | 136.9(2)   | N(2)—C(7)—C(6)                | 111.9(7) |
| O(5)—Ag(2)—Ag(1)                | 76.73(19)  | N(2)—C(7)—C(8)                | 104.0(7) |
| O(2)—Ag(2)—Ag(1)                | 80.03(16)  | C(6)—C(7)—C(8)                | 117.5(7) |
| O(1) <sup>i</sup> —Ag(2)—Ag(1)  | 147.65(16) | N(2)—C(7)—H(7)                | 107.6    |
| O(7)—Ag(2)—Ag(1)                | 68.66(17)  | C(6)—C(7)—H(7)                | 107.6    |
| C(1)—O(1)—Ag(1)                 | 124.1(5)   | C(8)—C(7)—H(7)                | 107.6    |
| C(1)—O(1)—Ag(2) <sup>ii</sup>   | 132.2(5)   | C(9)—C(8)—C(7)                | 102.5(7) |
| Ag(1)—O(1)—Ag(2) <sup>ii</sup>  | 103.7(2)   | C(9)—C(8)—H(8A)               | 111.3    |
| O(2)—C(1)—O(1)                  | 127.1(8)   | C(7)—C(8)—H(8A)               | 111.3    |
| O(2)—C(1)—C(2)                  | 117.7(7)   | C(9)—C(8)—H(8B)               | 111.3    |
| O(1)—C(1)—C(2)                  | 115.0(7)   | C(7)—C(8)—H(8B)               | 111.3    |
| C(1)—O(2)—Ag(2)                 | 113.6(5)   | H(8A)—C(8)—H(8B)              | 109.2    |
| N(1)—C(2)—C(3)                  | 102.8(7)   | O(6)—C(9)—C(10)               | 111.4(7) |
| N(1)—C(2)—C(1)                  | 110.7(7)   | O(6)—C(9)—C(8)                | 107.6(7) |
| C(3)—C(2)—C(1)                  | 110.0(7)   | C(10)—C(9)—C(8)               | 102.3(7) |
| N(1)—C(2)—H(2)                  | 111.0      | O(6)—C(9)—H(9)                | 111.7    |
| C(3)—C(2)—H(2)                  | 111.0      | C(10)—C(9)—H(9)               | 111.7    |
| C(1)—C(2)—H(2)                  | 111.0      | C(8)—C(9)—H(9)                | 111.7    |
| C(2)—C(3)—C(4)                  | 103.7(7)   | C(9)—O(6)—H(6)                | 109(7)   |
| C(2)—C(3)—H(3A)                 | 111.0      | N(2)—C(10)—C(9)               | 104.2(7) |
| C(4)—C(3)—H(3A)                 | 111.0      | N(2)—C(10)—H(10A)             | 110.9    |
| C(2)—C(3)—H(3B)                 | 111.0      | C(9)—C(10)—H(10A)             | 110.9    |
| C(4)—C(3)—H(3B)                 | 111.0      | N(2)—C(10)—H(10B)             | 110.9    |
| H(3A)—C(3)—H(3B)                | 109.0      | C(9)—C(10)—H(10B)             | 110.9    |
| O(3)—C(4)—C(3)                  | 107.2(8)   | H(10A)—C(10)—H(10B)           | 108.9    |
| O(3)—C(4)—C(5)                  | 111.9(8)   | C(7)—N(2)—C(10)               | 107.7(7) |
| C(3)—C(4)—C(5)                  | 103.1(7)   | C(7)—N(2)—H(2A)               | 110.2    |
| O(3)—C(4)—H(4)                  | 111.4      | C(10)—N(2)—H(2A)              | 110.2    |
| C(3)—C(4)—H(4)                  | 111.4      | C(7)—N(2)—H(2B)               | 110.2    |
| C(5)—C(4)—H(4)                  | 111.4      | C(10)—N(2)—H(2B)              | 110.2    |
| C(4)—O(3)—H(3)                  | 110(10)    | H(2A)—N(2)—H(2B)              | 108.5    |
| N(1)—C(5)—C(4)                  | 105.4(7)   | O(8)—N(3)—O(7)                | 120.6(9) |
| N(1)—C(5)—H(5A)                 | 110.7      | O(8)—N(3)—O(9)                | 121.2(9) |
| C(4)—C(5)—H(5A)                 | 110.7      | O(7)—N(3)—O(9)                | 118.2(8) |
| N(1)—C(5)—H(5B)                 | 110.7      | N(3)—O(7)—Ag(2)               | 98.9(6)  |
| C(4)—C(5)—H(5B)                 | 110.7      | O(10)—N(4)—O(11)              | 120.4(8) |
| H(5A)—C(5)—H(5B)                | 108.8      | O(10)—N(4)—O(12)              | 119.1(8) |
| C(2)—N(1)—C(5)                  | 108.8(7)   | O(11)—N(4)—O(12)              | 120.5(8) |

Table S5 Possible hydrogen bonds ( $\text{\AA}$ ,  $^\circ$ ) for AgHyp

| D-H...A                           | d(D-H)  | d(H...A) | d(D...A)  | <(DHA)  |
|-----------------------------------|---------|----------|-----------|---------|
| O(3)-H(3)...O(12) <sup>iii</sup>  | 0.81(4) | 2.08(9)  | 2.792(10) | 146(13) |
| N(1)-H(1A)...N(4) <sup>iv</sup>   | 0.87(4) | 2.51(6)  | 3.340(11) | 159(10) |
| N(1)-H(1A)...O(10) <sup>iv</sup>  | 0.87(4) | 2.21(7)  | 3.029(12) | 155(11) |
| N(1)-H(1A)...O(11) <sup>iv</sup>  | 0.87(4) | 2.38(9)  | 3.016(10) | 130(9)  |
| N(1)-H(1B)...N(4) <sup>v</sup>    | 0.86(4) | 2.61(8)  | 3.347(11) | 145(10) |
| N(1)-H(1B)...O(10) <sup>v</sup>   | 0.86(4) | 2.30(9)  | 2.939(12) | 132(10) |
| N(1)-H(1B)...O(12) <sup>v</sup>   | 0.86(4) | 2.20(8)  | 2.914(11) | 141(10) |
| O(6)-H(6)...O(9) <sup>viii</sup>  | 0.83(4) | 1.96(5)  | 2.773(9)  | 168(10) |
| N(2)-H(2A)...O(6) <sup>ii</sup>   | 0.91    | 1.99     | 2.773(10) | 144     |
| N(2)-H(2B)...O(3) <sup>viii</sup> | 0.91    | 1.98     | 2.823(10) | 154     |

Symmetry codes: (ii) x-1,y,z; (iii) x,y+1,z; (iv) -x+1,y+1/2,-z+1; (v) -x,y+1/2,-z+1; (viii) x+1,y-1,z

Table S6 IR spectral data assignments ( $\text{cm}^{-1}$ ) for complexes AgPro and AgHyp and their appropriate ligands Pro and Hyp.

|                                            | Pro       | AgPro      | Hyp       | AgHyp      |
|--------------------------------------------|-----------|------------|-----------|------------|
| $\nu(\text{OH})$                           | -         | -          | 3270      | 3261       |
| $\nu(\text{NH}_2^+) + \nu(\text{CH}_2)$    | 3330–2875 | 3300–2872  | 3200–2820 | 3200–2850  |
| $\delta(\text{NH}_2^+)$                    | 1605      | 1595       | 1635      | 1632       |
| $\nu_{\text{as}}(\text{COO}^-)$            | 1552      | 1561       | 1574      | 1569       |
| $\nu_{\text{s}}(\text{COO}^-)$             | 1447      | 1418       | 1392      | 1413       |
| $\Delta(\nu_{\text{as}} - \nu_{\text{s}})$ | -         | 143        | -         | 156        |
| $\delta(\text{CH}_2)_{\text{sciss.}}$      | 1472      | 1471       | -         | -          |
| $\nu_3$                                    | -         | 1450, 1360 | -         | 1444, 1365 |
| $\nu_4$                                    | -         | 767, 754   | -         | 753, 720   |
| $\Delta\nu_3$                              | -         | 90         | -         | 79         |
| $\Delta\nu_4$                              | -         | 13         | -         | 33         |
| $\omega(\text{CH}_2)$                      | 1375      | 1335       | 1358      | 1361       |
| $\nu(\text{NO}_3^-)$                       | -         | 1288       | -         | 1318       |
| $\nu_{\text{ring}}$                        | 1032, 913 | 1033, 925  | 1029, 919 | 1025, 920  |
| $\nu(\text{CCN})$                          | 847       | 853, 821   | 882, 843  | 821        |
| $\delta_{\text{ring}}$                     | 639       | 671        | 613       | 694        |
| $\rho(\text{COO}^-)$                       | 447       | 467        | 460       | 483        |

Table S7 Concentrations, absorbance at 600 nm and standard deviations for complexes AgPro and AgHyp

| <b>AgPro</b> | <i>Bacillus cereus</i>      |                           | <i>Pseudomonas aeruginosa</i> |                           | <i>Staphylococcus aureus</i> |                           |
|--------------|-----------------------------|---------------------------|-------------------------------|---------------------------|------------------------------|---------------------------|
| <b>c[mM]</b> | <b>A<sub>600</sub> ± SD</b> | <b>mean of diff. ± SE</b> | <b>A<sub>600</sub> ± SD</b>   | <b>mean of diff. ± SE</b> | <b>A<sub>600</sub> ± SD</b>  | <b>mean of diff. ± SE</b> |
| <b>0.5</b>   | 0.273 ± 0.030               | 0.280±0.03                | 0.064 ± 0.009                 | 0.949±0.021               | 0.103 ± 0.019                | 0.963±0.027               |
| <b>0.25</b>  | 0.323 ± 0.032               | 0.230±0.03                | 0.049 ± 0.004                 | 0.963±0.021               | 0.099 ± 0.020                | 0.967±0.027               |
| <b>0.125</b> | 0.383 ± 0.026               | 0.170±0.03                | 0.055 ± 0.018                 | 0.957±0.021               | 0.085 ± 0.023                | 0.982±0.027               |
| <b>0.063</b> | 0.412 ± 0.019               | 0.141±0.03                | 0.069 ± 0.002                 | 0.944±0.021               | 0.845 ± 0.025                | 0.221±0.027               |
| <b>0.031</b> | 0.410 ± 0.021               | 0.143±0.03                | 0.977 ± 0.026                 | 0.036±0.021               | 0.985 ± 0.029                | 0.081±0.027               |
| <b>0.016</b> | 0.419 ± 0.027               | 0.134±0.03                | 0.987 ± 0.047                 | 0.026±0.021               | 1.012 ± 0.037                | 0.055±0.027               |
| <b>0.008</b> | 0.437 ± 0.041               | 0.117±0.03                | 1.013 ± 0.076                 | 0.026±0.021               | 1.028 ± 0.035                | 0.038±0.027               |

  

| <b>AgHyp</b> | <i>Bacillus cereus</i>      |                           | <i>Pseudomonas aeruginosa</i> |                           | <i>Staphylococcus aureus</i> |                           |
|--------------|-----------------------------|---------------------------|-------------------------------|---------------------------|------------------------------|---------------------------|
| <b>c[mM]</b> | <b>A<sub>600</sub> ± SD</b> | <b>mean of diff. ± SE</b> | <b>A<sub>600</sub> ± SD</b>   | <b>mean of diff. ± SE</b> | <b>A<sub>600</sub> ± SD</b>  | <b>mean of diff. ± SE</b> |
| <b>0.5</b>   | 0.043 ± 0.002               | 0.510±0.028               | 0.05 ± 0.001                  | 0.963±0.022               | 0.075 ± 0.003                | 0.991±0.04                |
| <b>0.25</b>  | 0.053 ± 0.006               | 0.501±0.028               | 0.089 ± 0.013                 | 0.923±0.022               | 0.101 ± 0.036                | 0.966±0.04                |
| <b>0.125</b> | 0.047 ± 0.001               | 0.507±0.028               | 0.075 ± 0.006                 | 0.937±0.022               | 0.137 ± 0.055                | 0.929±0.04                |
| <b>0.063</b> | 0.048 ± 0.002               | 0.506±0.028               | 0.083 ± 0.009                 | 0.929±0.022               | 0.614 ± 0.041                | 0.453±0.04                |
| <b>0.031</b> | 0.356 ± 0.031               | 0.031±0.028               | 0.863 ± 0.049                 | 0.150±0.022               | 0.795 ± 0.075                | 0.272±0.04                |
| <b>0.016</b> | 0.503 ± 0.033               | 0.050±0.028               | 0.953 ± 0.053                 | 0.059±0.022               | 0.812 ± 0.074                | 0.255±0.04                |
| <b>0.008</b> | 0.512 ± 0.003               | 0.041±0.028               | 1.027 ± 0.045                 | 0.014±0.022               | 0.906 ± 0.085                | 0.160±0.04                |

Table S8 Effect of the level of theory used on the predicted difference  $\Delta_{21}(\log P)$  in the  $2^N$  and  $1^N$   $\log P$  values. Except from XTb, PM7 (see the footnote), 3-21G was chosen as the basis set, CPCM as the solvation model. The calculated equilibrium constants for the mutual isomeric interconversion  $1^O \rightarrow 1^N$ ,  $2^O \rightarrow 2^N$  are provided as well.

| Level of theory   | Complex AgPro                           |                                            |          | Complex AgHyp                           |                                            |          | diff. $\Delta_{21}$<br>( $\log P$ ) |
|-------------------|-----------------------------------------|--------------------------------------------|----------|-----------------------------------------|--------------------------------------------|----------|-------------------------------------|
|                   | $\log K^w$<br>( $1^O \rightarrow 1^N$ ) | $\log K^{oc}$<br>( $1^O \rightarrow 1^N$ ) | $\log P$ | $\log K^w$<br>( $2^O \rightarrow 2^N$ ) | $\log K^{oc}$<br>( $2^O \rightarrow 2^N$ ) | $\log P$ |                                     |
| experiment        |                                         |                                            | -1.46    |                                         |                                            | -1.16    | 0.30                                |
| XTB <sup>a)</sup> | 4.49                                    | 3.63                                       | -0.41    | 2.33                                    | 1.68                                       | -0.98    | -0.57                               |
| PM7 <sup>b)</sup> | 6.32                                    | 5.43                                       | -2.42    | 4.75                                    | 3.85                                       | -2.92    | -0.50                               |
| HF                | 1.41                                    | 1.03                                       | -2.46    | -0.52                                   | -0.93                                      | -2.80    | -0.34                               |
| X3LYP             | 2.96                                    | 2.70                                       | -1.87    | 1.59                                    | 1.23                                       | -2.21    | -0.35                               |
| O3LYP             | 1.38                                    | 1.09                                       | -1.96    | 0.19                                    | -0.20                                      | -2.37    | -0.41                               |
| BLYP              | 2.66                                    | 2.32                                       | -1.79    | 1.69                                    | 1.51                                       | -1.88    | -0.09                               |
| LC-BLYP           | 3.41                                    | 4.09                                       | -0.91    | 2.46                                    | 2.09                                       | -2.28    | -1.37                               |
| B3LYP             | 3.44                                    | 2.62                                       | -2.42    | 1.41                                    | 1.05                                       | -2.22    | 0.20                                |
| CAM-B3LYP         | 3.69                                    | 3.17                                       | -2.14    | 1.92                                    | 1.48                                       | -2.30    | -0.16                               |
| B3LYP+GD3         | 3.94                                    | 3.83                                       | -1.72    | 2.79                                    | 2.44                                       | -2.21    | -0.48                               |
| M06               | 3.91                                    | 3.15                                       | -2.69    | 2.32                                    | 1.87                                       | -2.36    | 0.33                                |
| M06HF             | 6.07                                    | 5.36                                       | -2.47    | 5.09                                    | 4.84                                       | -2.34    | 0.13                                |
| M06-2X            | 4.49                                    | 4.23                                       | -2.06    | 2.65                                    | 2.28                                       | -2.46    | -0.40                               |
| wB97              | 3.47                                    | 3.28                                       | -1.95    | 2.02                                    | 1.49                                       | -2.54    | -0.59                               |
| wB97X             | 3.42                                    | 3.09                                       | -2.01    | 2.06                                    | 1.51                                       | -2.56    | -0.55                               |
| wB97XD            | 4.40                                    | 4.11                                       | -2.04    | 2.94                                    | 2.42                                       | -2.52    | -0.48                               |
| MP2               | 1.90                                    | 1.71                                       | -2.03    | 0.79                                    | 0.53                                       | -2.35    | -0.32                               |

<sup>a)</sup> XTb/GFN2 with the ALPB solvation model

<sup>b)</sup> PM7 with the CPCM solvation model



Table S9 Effect of the basis set used on the predicted difference  $\Delta_{21}(\log P)$  in the  $2^N$  and  $1^N$   $\log P$  values. In all cases, B3LYP functional together with CPCM as the solvation model was utilized. The calculated equilibrium constants for the mutual isomeric interconversion  $1^O \rightarrow 1^N$ ,  $2^O \rightarrow 2^N$  are provided as well.

| Basis set              | Complex AgPro                           |                                            |          | Complex AgHyp                           |                                            |          | diff. $\Delta_{21}$<br>( $\log P$ ) |
|------------------------|-----------------------------------------|--------------------------------------------|----------|-----------------------------------------|--------------------------------------------|----------|-------------------------------------|
|                        | $\log K^w$<br>( $1^O \rightarrow 1^N$ ) | $\log K^{oc}$<br>( $1^O \rightarrow 1^N$ ) | $\log P$ | $\log K^w$<br>( $2^O \rightarrow 2^N$ ) | $\log K^{oc}$<br>( $2^O \rightarrow 2^N$ ) | $\log P$ |                                     |
| experiment             |                                         |                                            | -1.46    |                                         |                                            | -1.16    | 0.30                                |
| STO-3G                 | 7.04                                    | 6.78                                       | -0.85    | 6.22                                    | 6.05                                       | -0.88    | -0.03                               |
| CEP-4G                 | 6.70                                    | 6.64                                       | -1.68    | 6.75                                    | 6.30                                       | -2.03    | -0.36                               |
| 3-21G                  | 3.44                                    | 2.62                                       | -2.42    | 1.41                                    | 1.05                                       | -2.22    | 0.20                                |
| 6-31G* <sup>a)</sup>   | 2.85                                    | 2.13                                       | -2.57    | 1.21                                    | 0.48                                       | -2.81    | -0.24                               |
| 6-311+G* <sup>a)</sup> | 6.34                                    | 6.05                                       | -2.84    | 4.30                                    | 3.60                                       | -3.12    | -0.29                               |

<sup>a)</sup> 3-21G basis set was set for the silver(I) atom.

Table S10 Effect of the chosen implicit solvation model on the predicted difference  $\Delta_{21}(\log P)$  in the  $2^N$  and  $1^N$   $\log P$  values. In all cases, B3LYP functional together with 3-21G basis set was used. The calculated equilibrium constants for the mutual isomeric interconversion  $1^O \rightarrow 1^N$ ,  $2^O \rightarrow 2^N$  are provided as well.

| Solvation model | Complex AgPro                           |                                            |          | Complex AgHyp                           |                                            |          | diff. $\Delta_{21}$<br>( $\log P$ ) |
|-----------------|-----------------------------------------|--------------------------------------------|----------|-----------------------------------------|--------------------------------------------|----------|-------------------------------------|
|                 | $\log K^w$<br>( $1^O \rightarrow 1^N$ ) | $\log K^{oc}$<br>( $1^O \rightarrow 1^N$ ) | $\log P$ | $\log K^w$<br>( $2^O \rightarrow 2^N$ ) | $\log K^{oc}$<br>( $2^O \rightarrow 2^N$ ) | $\log P$ |                                     |
| experiment      |                                         |                                            | -1.46    |                                         |                                            | -1.16    | 0.30                                |
| CPCM            | 3.44                                    | 2.62                                       | -2.42    | 1.41                                    | 1.05                                       | -2.22    | 0.20                                |
| IEFPCM          | 3.32                                    | 2.47                                       | -2.86    | 1.35                                    | 0.74                                       | -2.98    | -0.12                               |
| SMD             | 2.40                                    | 2.91                                       | -3.41    | 1.26                                    | 1.45                                       | -4.80    | -1.38                               |

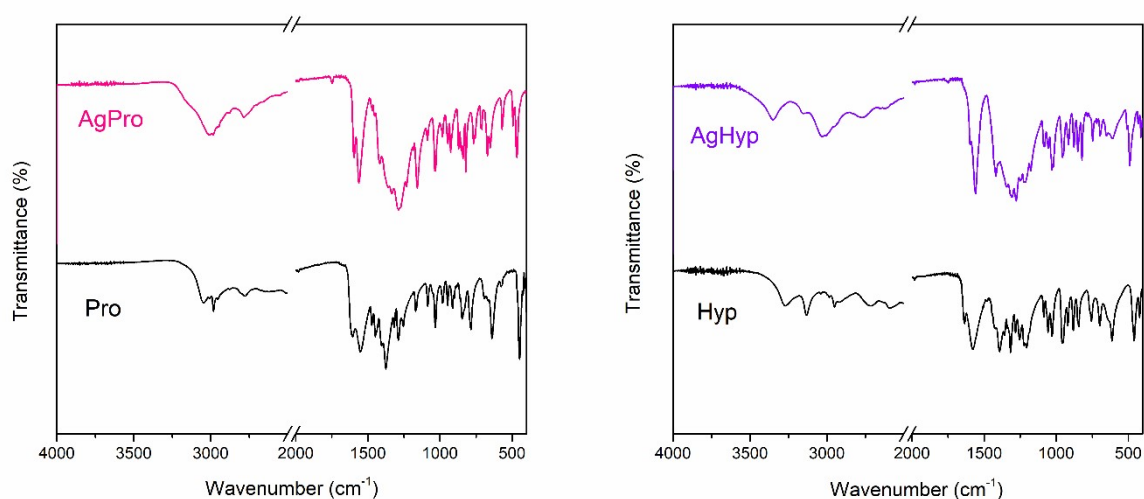

Figure S1 IR spectra of free ligands (black lines) and silver(I) complexes AgPro (pink line) and AgHyp (violet line)

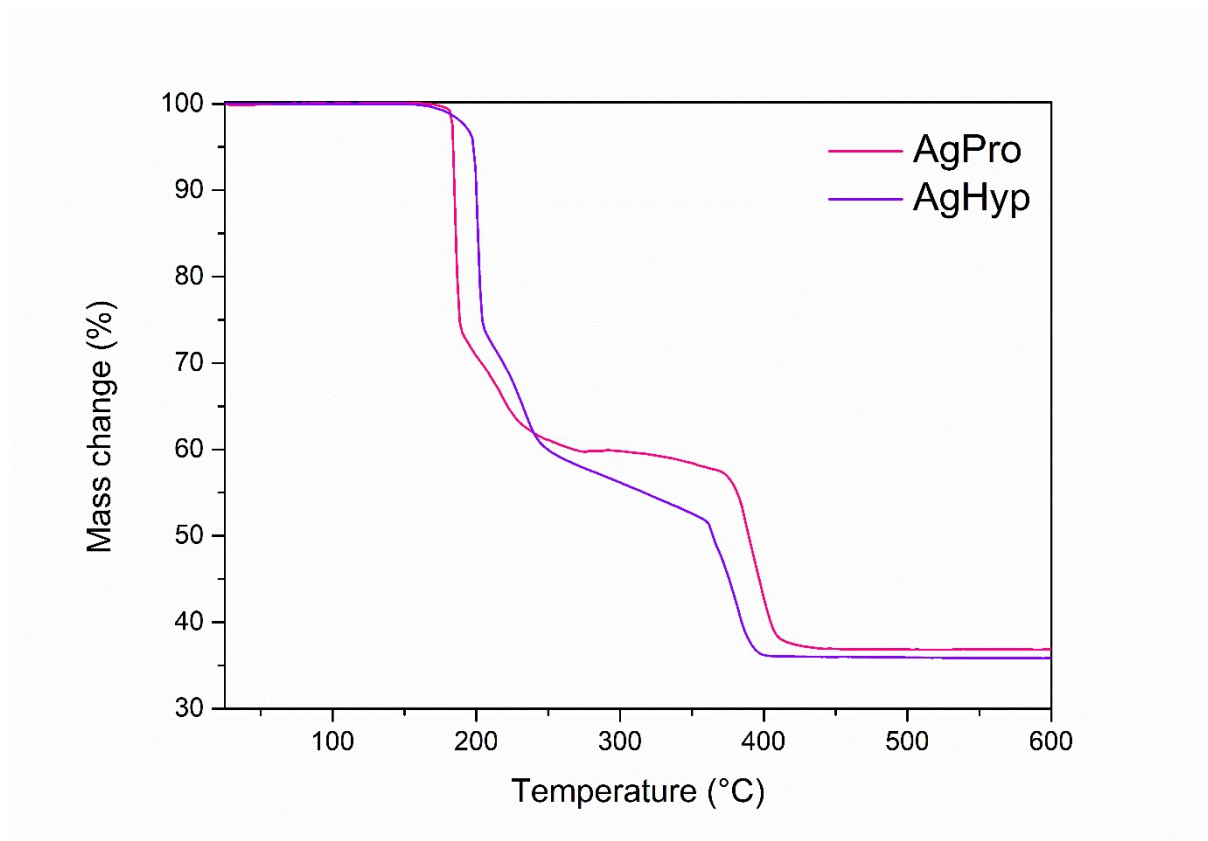

Figure S2 Thermogravimetric curves for studied silver(I) complexes measured in the air atmosphere in the temperature range of 25–600 °C.

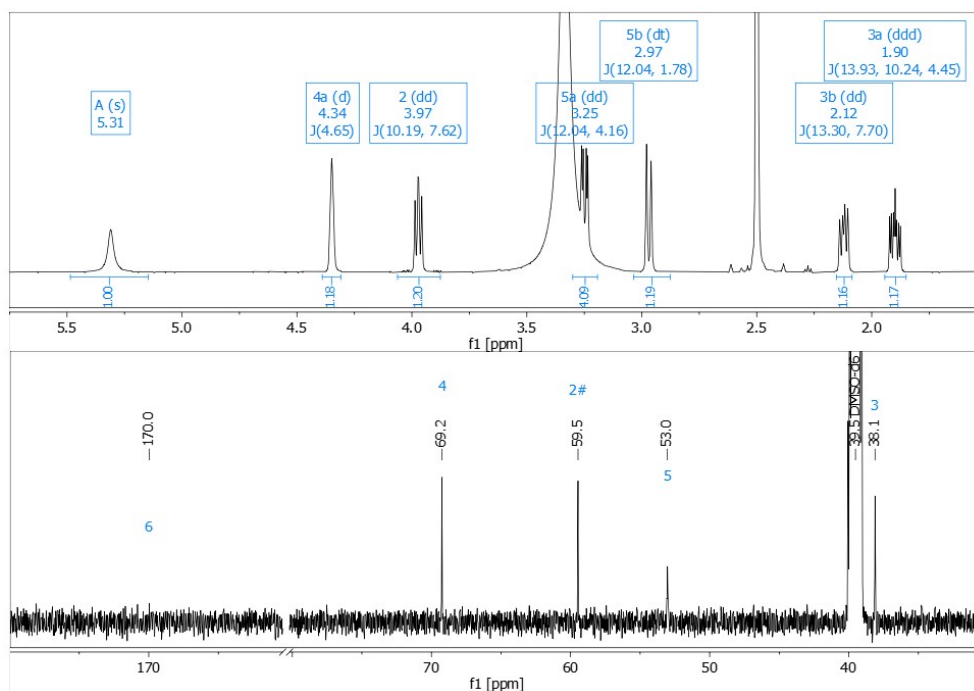

Figure S3  $^1\text{H}$  NMR (600 MHz,  $\text{DMSO-d}_6$ ) and  $^{13}\text{C}$  NMR (150 MHz,  $\text{DMSO-d}_6$ ) spectra of complex AgHyp.

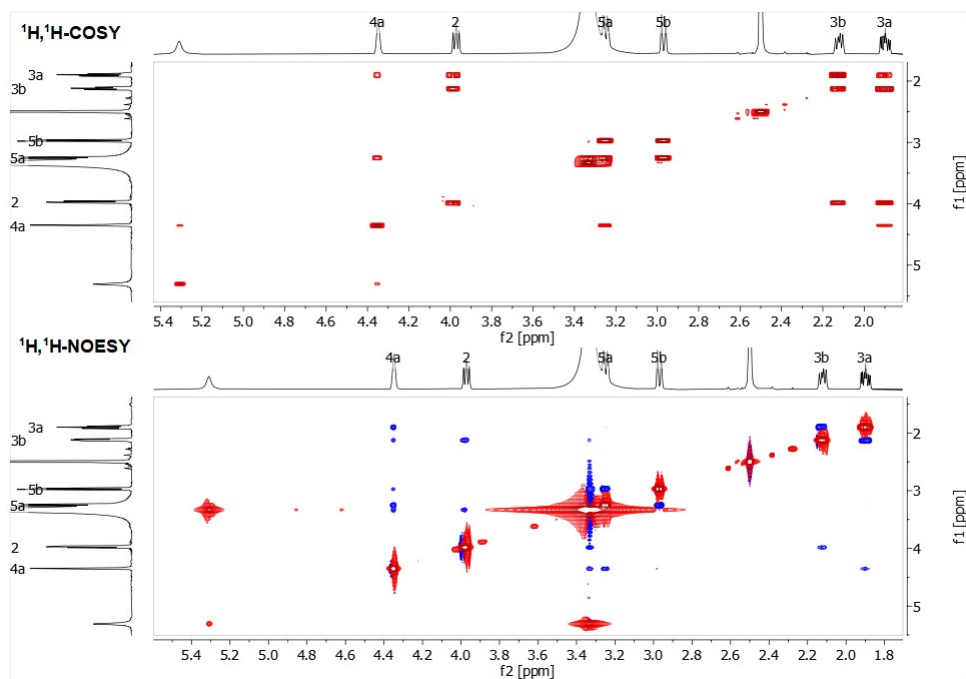

Figure S4 <sup>1</sup>H, <sup>1</sup>H-COSY and <sup>1</sup>H, <sup>1</sup>H-NOESY (DMSO-d<sub>6</sub>) spectra of complex AgHyp.

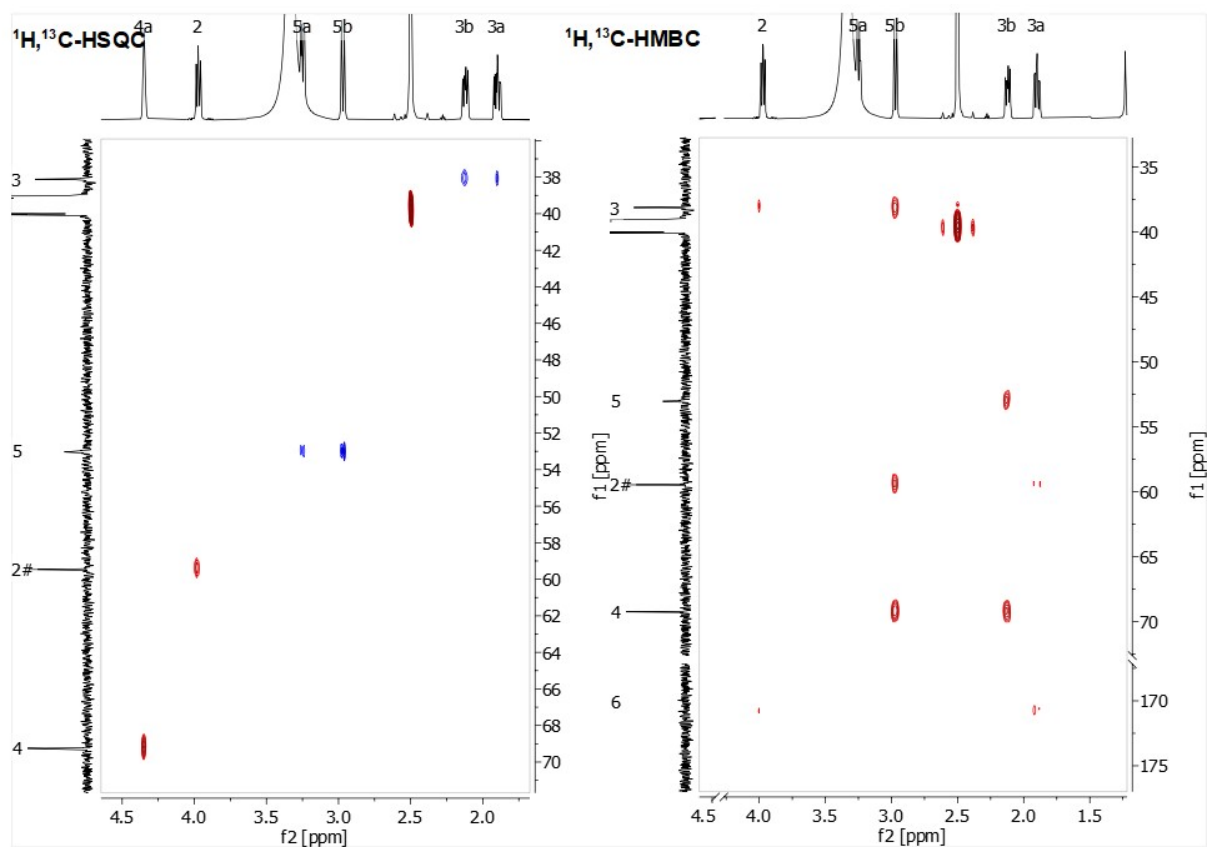

Figure S5 <sup>1</sup>H, <sup>13</sup>C-HSQC and <sup>1</sup>H, <sup>13</sup>C-HMBC (DMSO-d<sub>6</sub>) spectra of complex AgHyp.

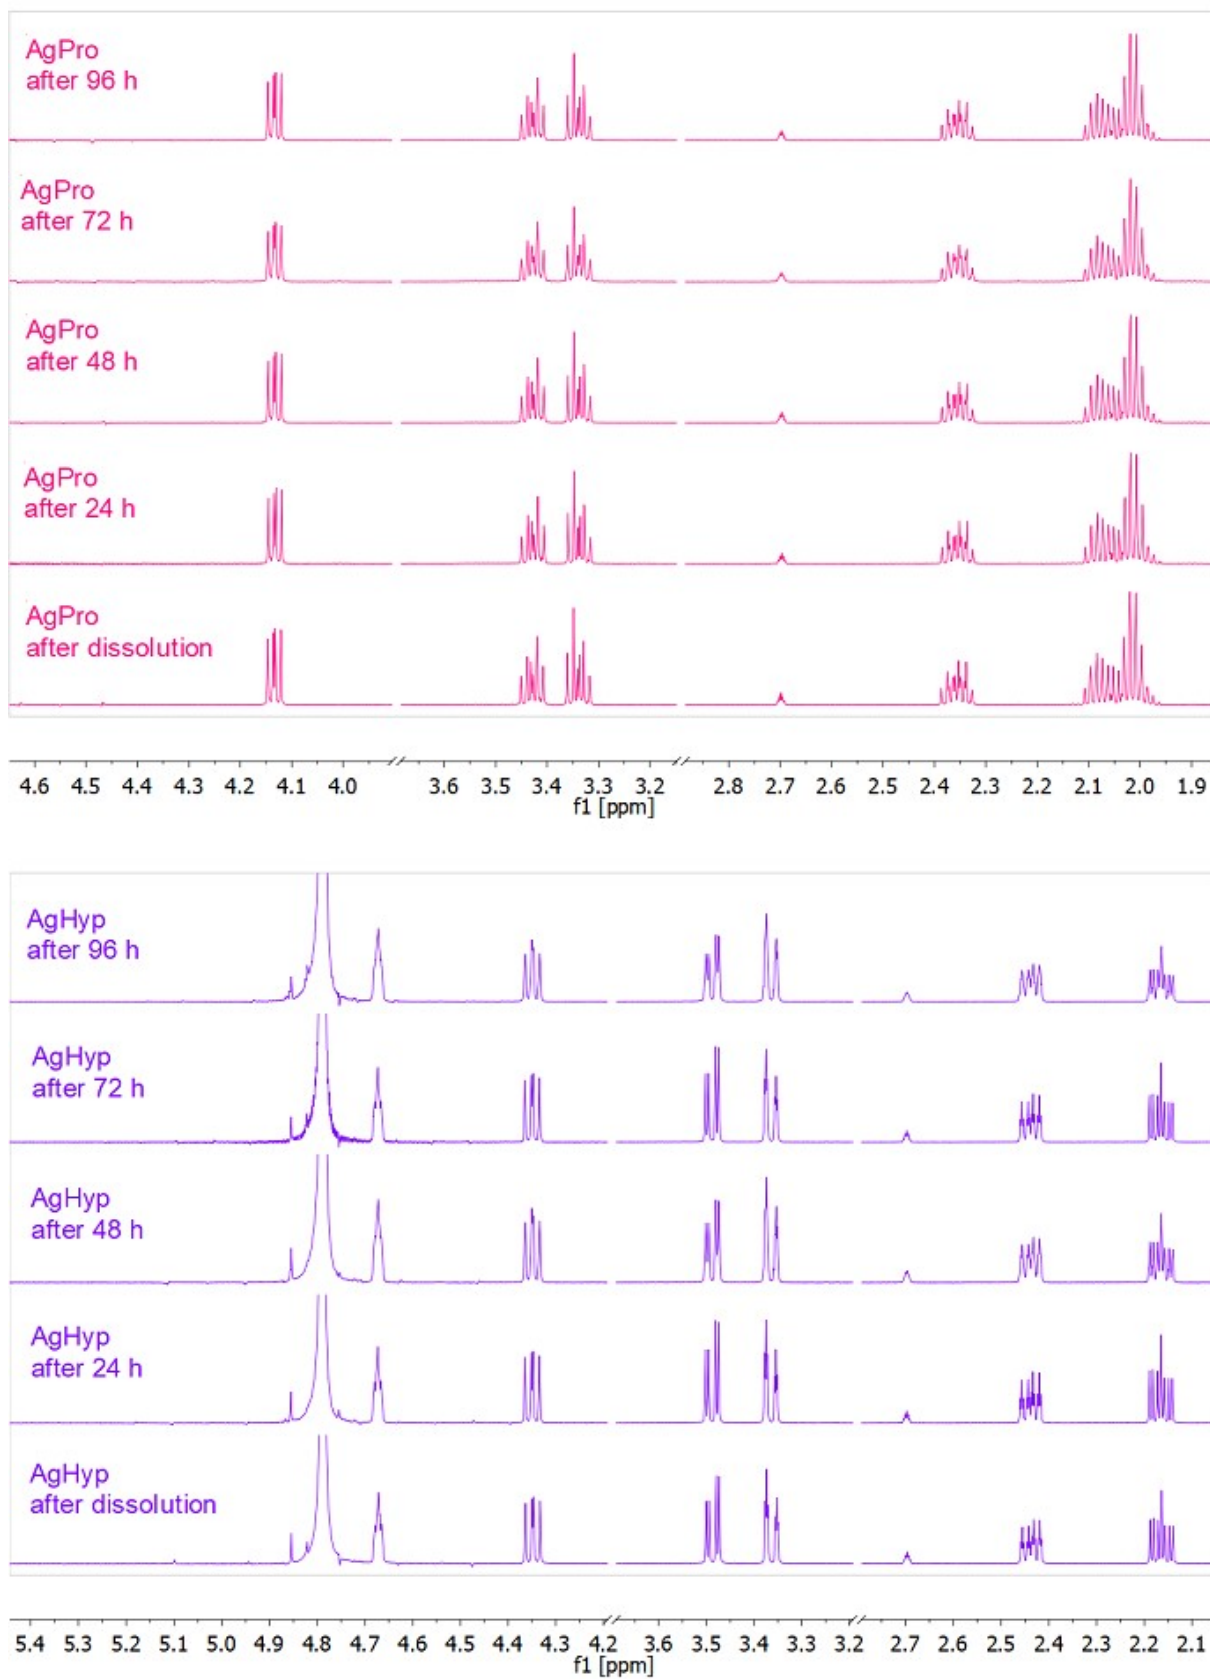

Figure S6 Time-dependent  $^1\text{H}$  NMR spectra of AgPro (pink lines) and AgHyp (violet lines) complexes recorded in 1%  $\text{DMSO-}d_6/\text{D}_2\text{O}$ .

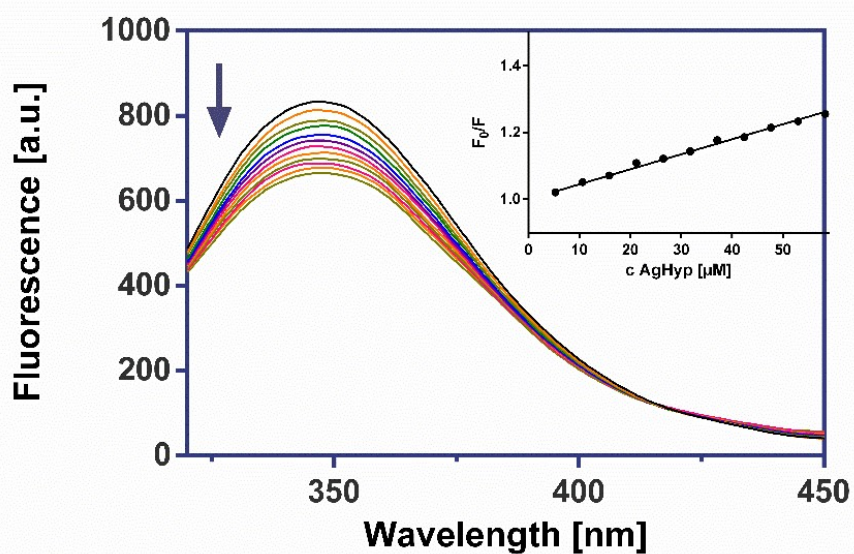

Figure S7 Fluorescence quenching spectra of BSA in presence of AgHyp. Inset: The corresponding Stern–Volmer plot for AgHyp and BSA at 293.15 K.

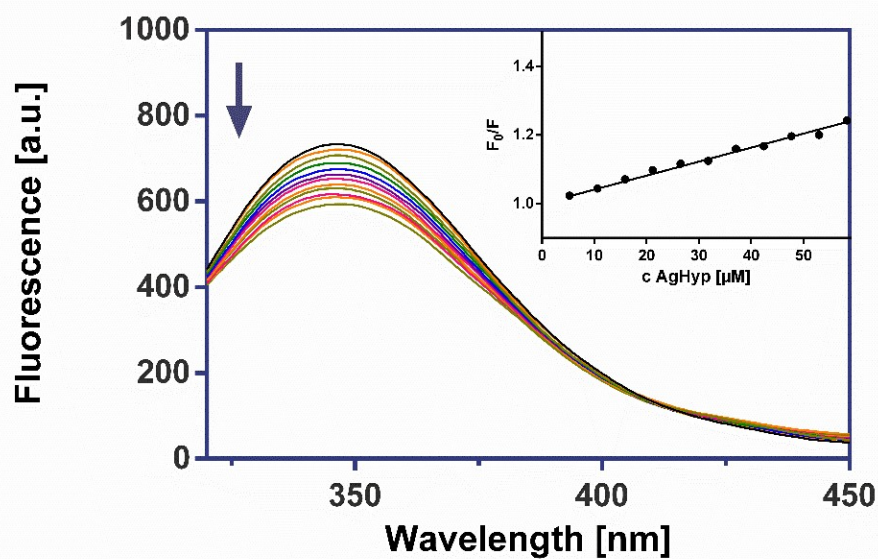

Figure S8 Fluorescence quenching spectra of BSA in presence of AgHyp. Inset: The corresponding Stern–Volmer plot for AgHyp and BSA at 303.15 K.

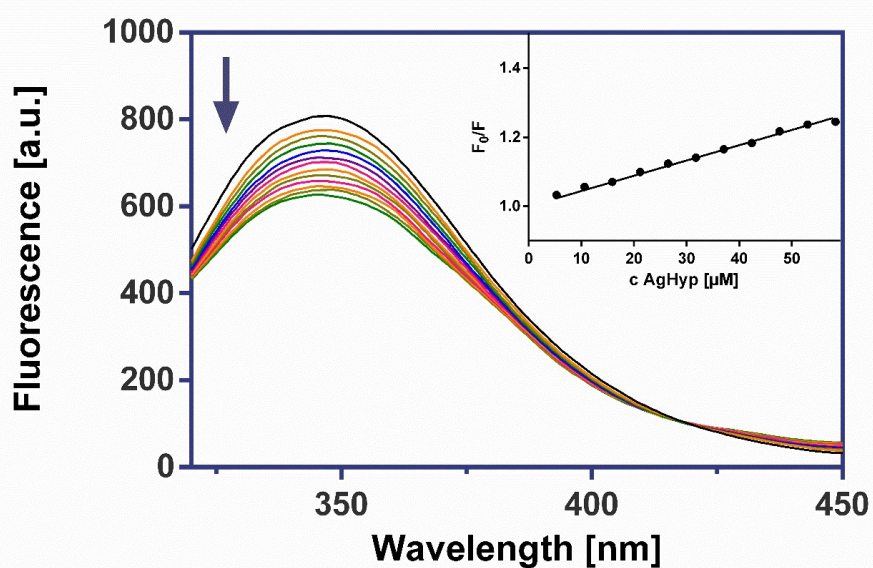

Figure

Figure S9 Fluorescence quenching spectra of BSA in presence of AgHyp. Inset: The corresponding Stern–Volmer plot for AgHyp and BSA at 308.15 K.

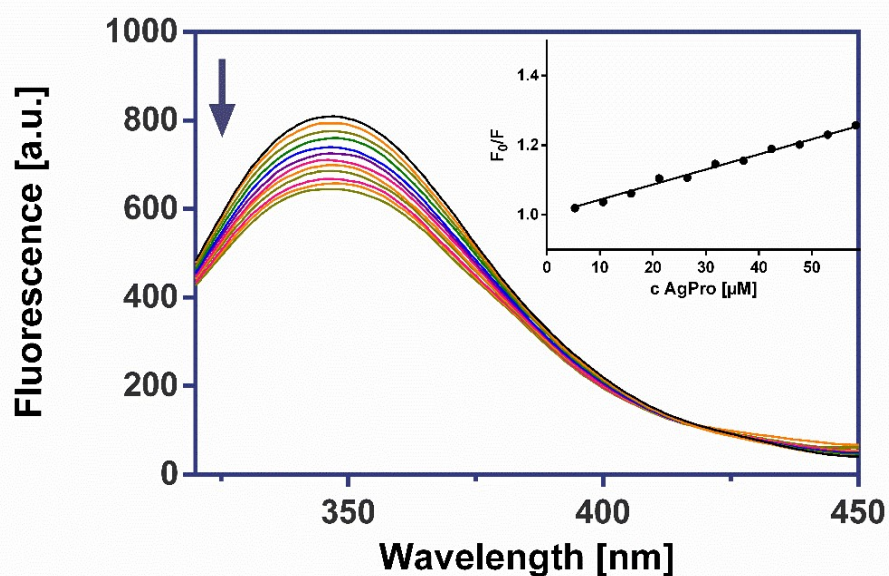

Figure S10 Fluorescence quenching spectra of BSA in presence of AgPro. Inset: The corresponding Stern–Volmer plot for AgPro and BSA at 293.15 K.

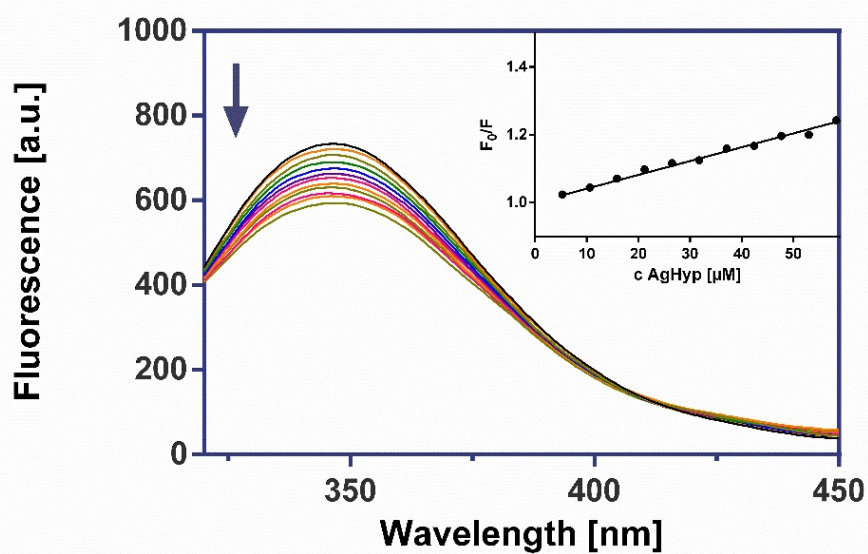

Figure S11 Fluorescence quenching spectra of BSA in presence of AgPro. Inset: The corresponding Stern–Volmer plot for AgPro and BSA at 303.15 K.

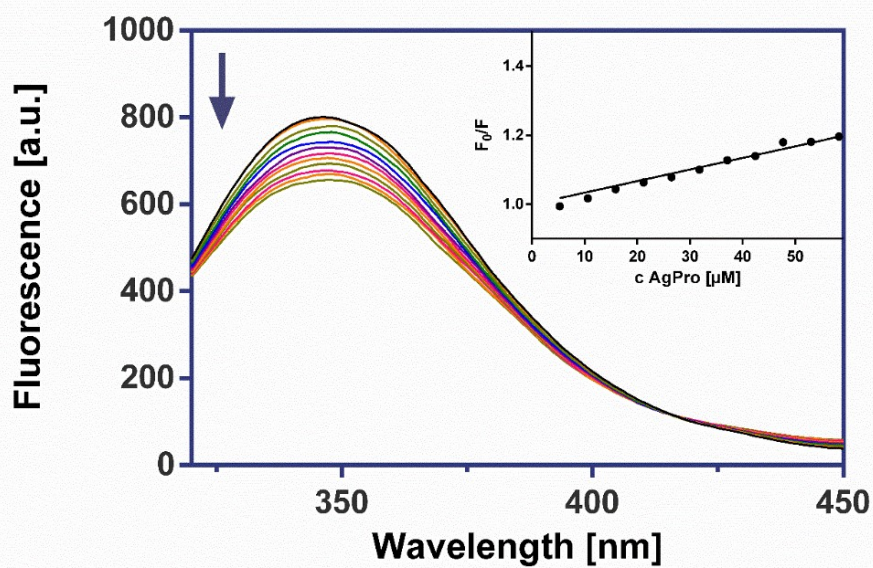

Figure S12 Fluorescence quenching spectra of BSA in presence of AgPro. Inset: The corresponding Stern–Volmer plot for AgPro and BSA at 308.15 K.



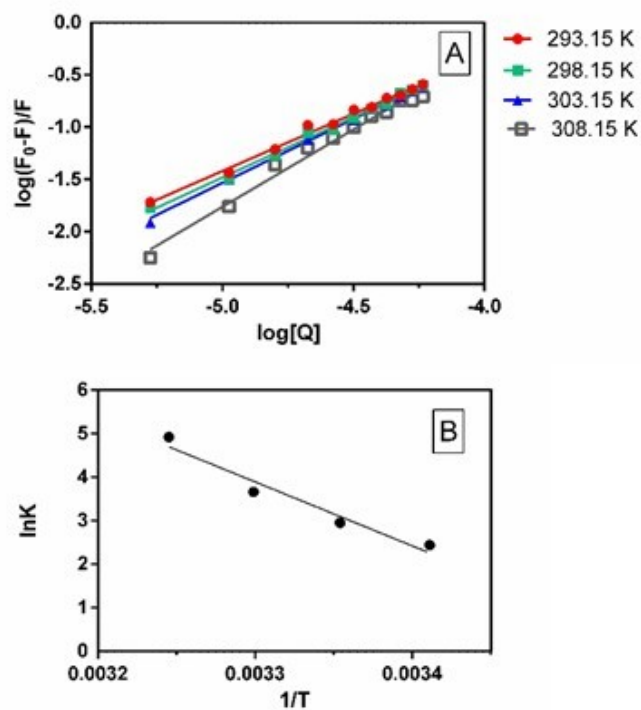

Figure S13 (A) Plot of  $\log[(F_0 - F) / F]$  vs.  $\log[AgPro]$  at different temperatures. (B) Van't Hoff diagram of the AgPro complex interaction with BSA.

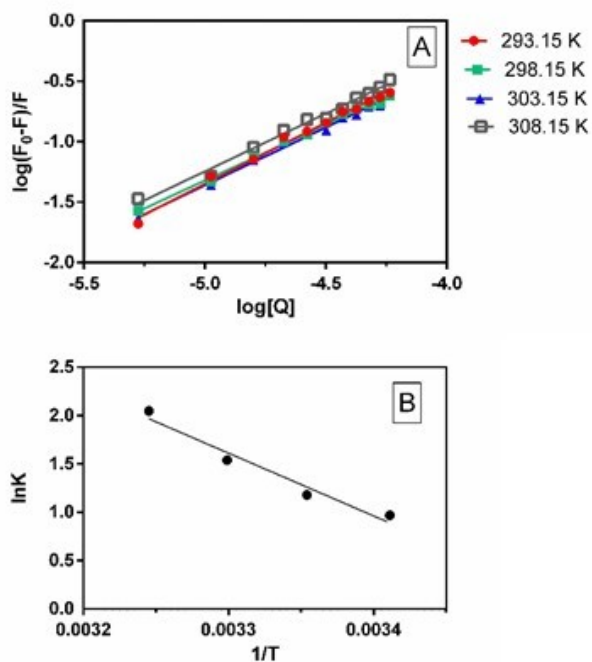

Figure 14 (A) Plot of  $\log [(F_0 - F) / F]$  vs.  $\log[AgHyp]$  at different temperatures. (B) Van't Hoff diagram of the AgHyp complex interaction with BSA.
